# Supplementary material
Source: PubMed Central journal article supplement (PMC7883295)
Supplement: EMBJ-40-e105106-s001.pdf [file EMBJ-40-e105106-s001.pdf]

## Expanded View Figures

### Figure EV1. PIDD1 is recruited to the centriole distal appendage.

- A Schematic outlining the competition growth assay used to measure fold change in the number of GFP+ cells treated with doxycycline compared to control, untreated GFP- cells.
- B Graph showing the relative growth of doxycycline-treated PLK4<sup>Dox</sup>; *TRIM37*<sup>-/-</sup> cells expressing an sgRNA targeting the indicated genes. Each dot displays measurements from a single experiment. Experiments were performed in polyclonal knockout cells. Data acquired across  $n \geq 3$  biological replicates. Mean  $\pm$  s.e.m.
- C Representative images of PLK4<sup>Dox</sup> RPE1 cells treated with and without doxycycline for two days and immunostained with the indicated antibodies. Scale bar = 5  $\mu$ m.
- D Representative images of wild-type and *PIDD1*<sup>-/-</sup> PLK4<sup>Dox</sup> RPE1 cells treated with and without doxycycline for two days and immunostained with the indicated antibodies. Scale bar = 5  $\mu$ m.
- E Representative images of PLK4<sup>Dox</sup> *PIDD1*-mNeonGreen DLD1 cells treated with and without doxycycline for 2 days and immunostained with the indicated antibodies. Scale bar = 5  $\mu$ m.
- F Representative images of *WT* or knockout PLK4<sup>Dox</sup> cells immunostained with the indicated antibodies. Experiments were performed in PLK4<sup>Dox</sup> monoclonal knockout cells. Scale bar = 5  $\mu$ m.
- G Quantification of the fraction of cells with the indicated protein localized at the centriole. Experiments were performed in PLK4<sup>Dox</sup> monoclonal knockout cells. Data acquired across  $n = 3$  biological replicates. Mean  $\pm$  s.e.m.
- H Representative images of *WT* or knockout PLK4<sup>Dox</sup> cells immunostained with the indicated antibodies. Experiments were performed in PLK4<sup>Dox</sup> monoclonal knockout cells. Scale bar = 5  $\mu$ m.

Data information: Asterisks indicate statistically significant differences between measurements (\* $P < 0.05$ ; \*\* $P < 0.01$ ; \*\*\* $P < 0.001$ , \*\*\*\* $P < 0.0001$ ). Statistics for all Figures were calculated using a two-tailed Student's *t*-test.

Source data are available online for this figure.

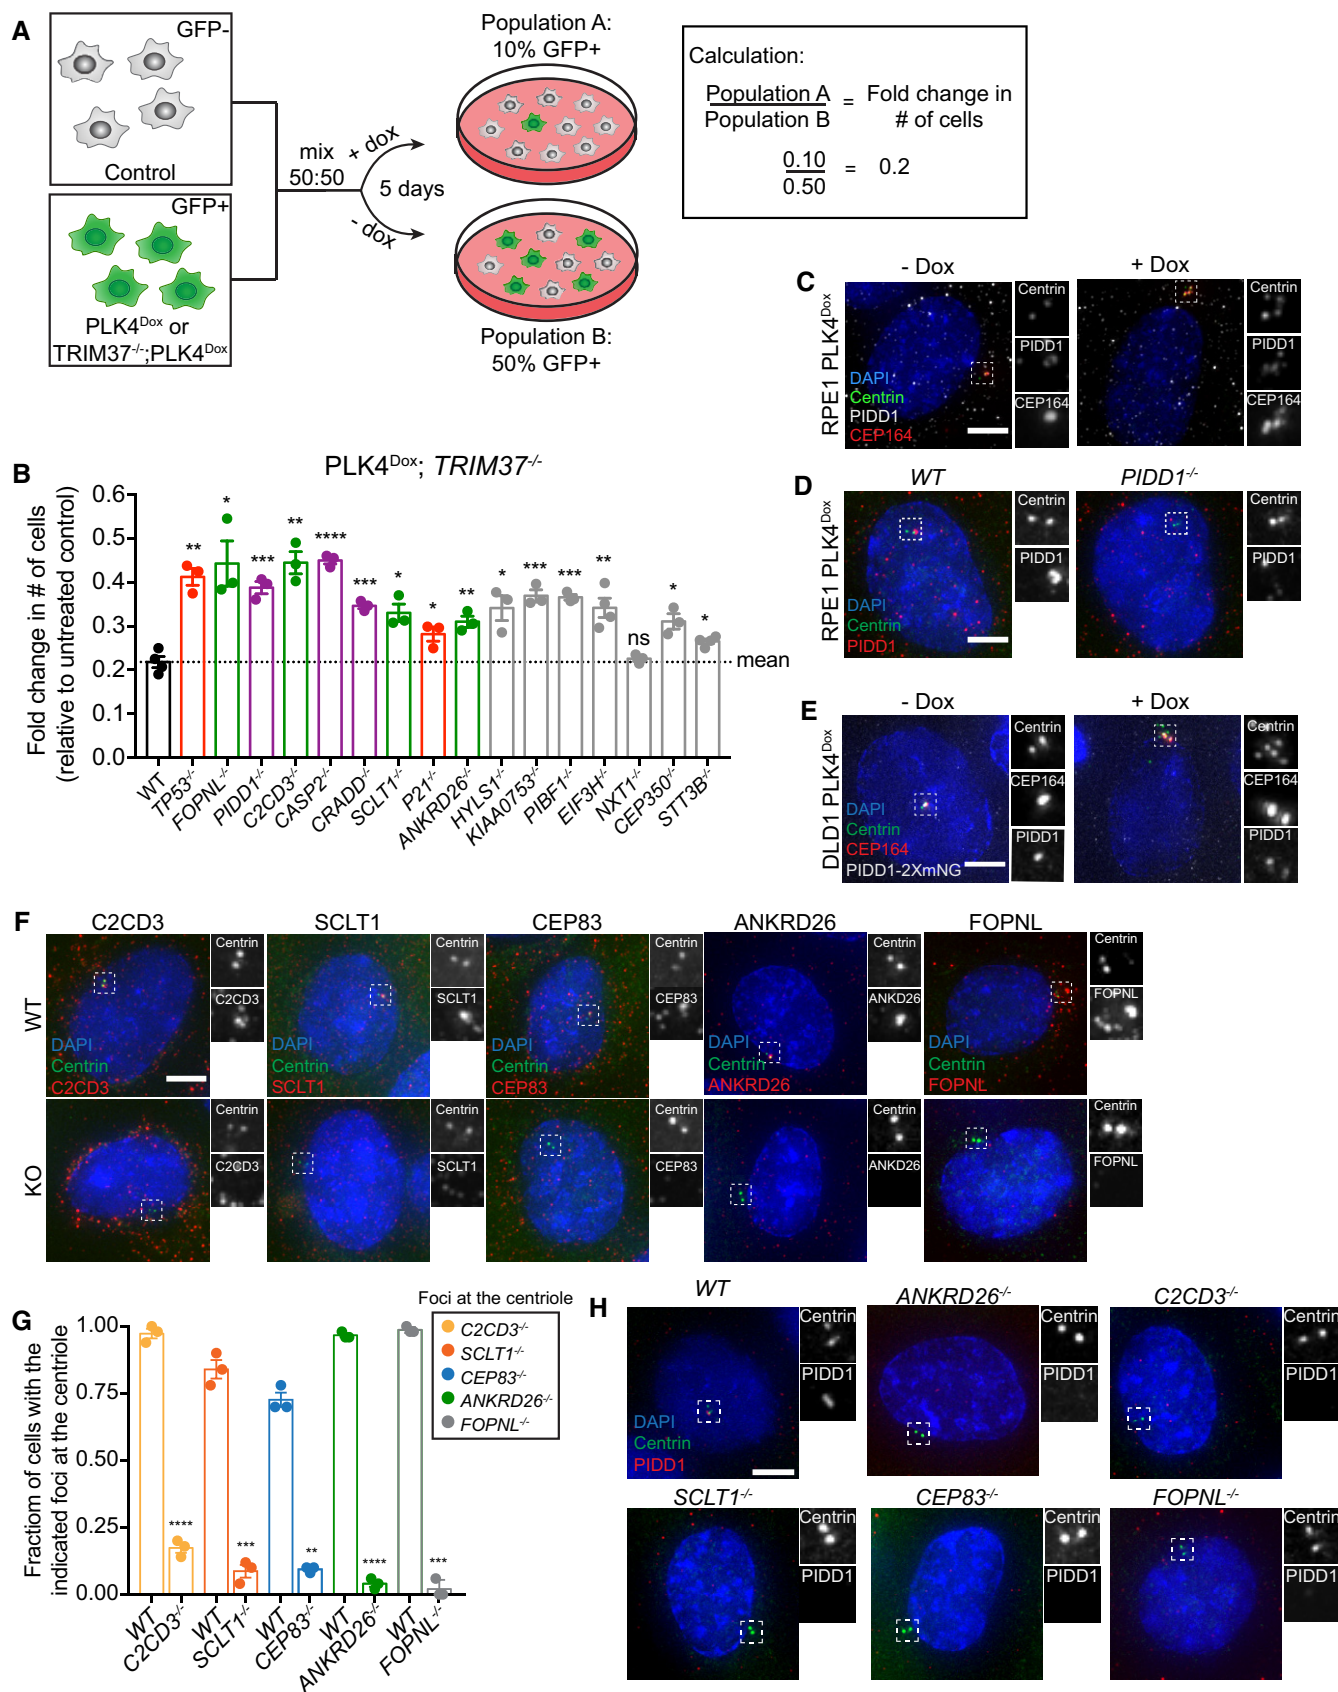

Figure EV1.

**Figure EV2. ANKRD26 is not required for the assembly of functional centrosomes.**

- A Representative images of monoclonal PLK4<sup>Dox</sup> knockout cells. Cells were stained with the indicated antibodies. Scale bar = 5  $\mu$ m.
- B Quantification of the fraction of cells with the indicated mitotic spindle orientation following treatment with the centrosome declustering agent griseofulvin. Experiments were performed in monoclonal PLK4<sup>Dox</sup> knockout cells. Data acquired across  $n = 3$  biological replicates. Mean  $\pm$  s.e.m.
- C Representative images of PLK4<sup>Dox</sup> cells treated with and without doxycycline for two days then treated with griseofulvin for 24 h. Experiments were performed in monoclonal PLK4<sup>Dox</sup> knockout cells. Cells were immunostained with indicated antibodies. Scale bar = 5  $\mu$ m.
- D Graph showing the relative growth of doxycycline-treated SAS6<sup>Dox</sup> cells that were knocked out for the indicated genes. Experiments were performed in SAS6<sup>Dox</sup> monoclonal knockout cells. Each dot displays measurements from a single experiment. Data acquired across  $n = 3$  biological replicates. Mean  $\pm$  s.e.m.
- E Quantification of centrosome number in SAS6<sup>Dox</sup> cells expressing an sgRNA targeting the indicated genes. Experiments were performed in SAS6<sup>Dox</sup> monoclonal knockout cells. Data acquired across  $n = 3$  biological replicates. Mean  $\pm$  s.e.m.
- F Quantification of the fold change in cycling cells with a DNA content  $> 4N$  following cytokinesis failure. Experiments were performed in PLK4<sup>Dox</sup> monoclonal knockout cells. Each dot displays measurements from a single experiment. Data acquired across  $n = 4$  biological replicates. Mean  $\pm$  s.e.m.
- G Schematic showing the treatment regime for the cytokinesis failure assay shown in (F). Cells were treated with cytochalasin B for 24 h to induce cytokinesis failure followed by treatment with EdU and DMN to mark S-phase cells and block progression through mitosis. The fraction of EdU+ cells with a DNA content  $> 4N$  was measured using flow cytometry.

Data information: Asterisks indicate statistically significant differences between measurements ( $*P < 0.05$ ;  $***P < 0.001$ ,  $****P < 0.0001$ ). Statistics for all Figures were calculated using a two-tailed Student's  $t$ -test.

Source data are available online for this figure.

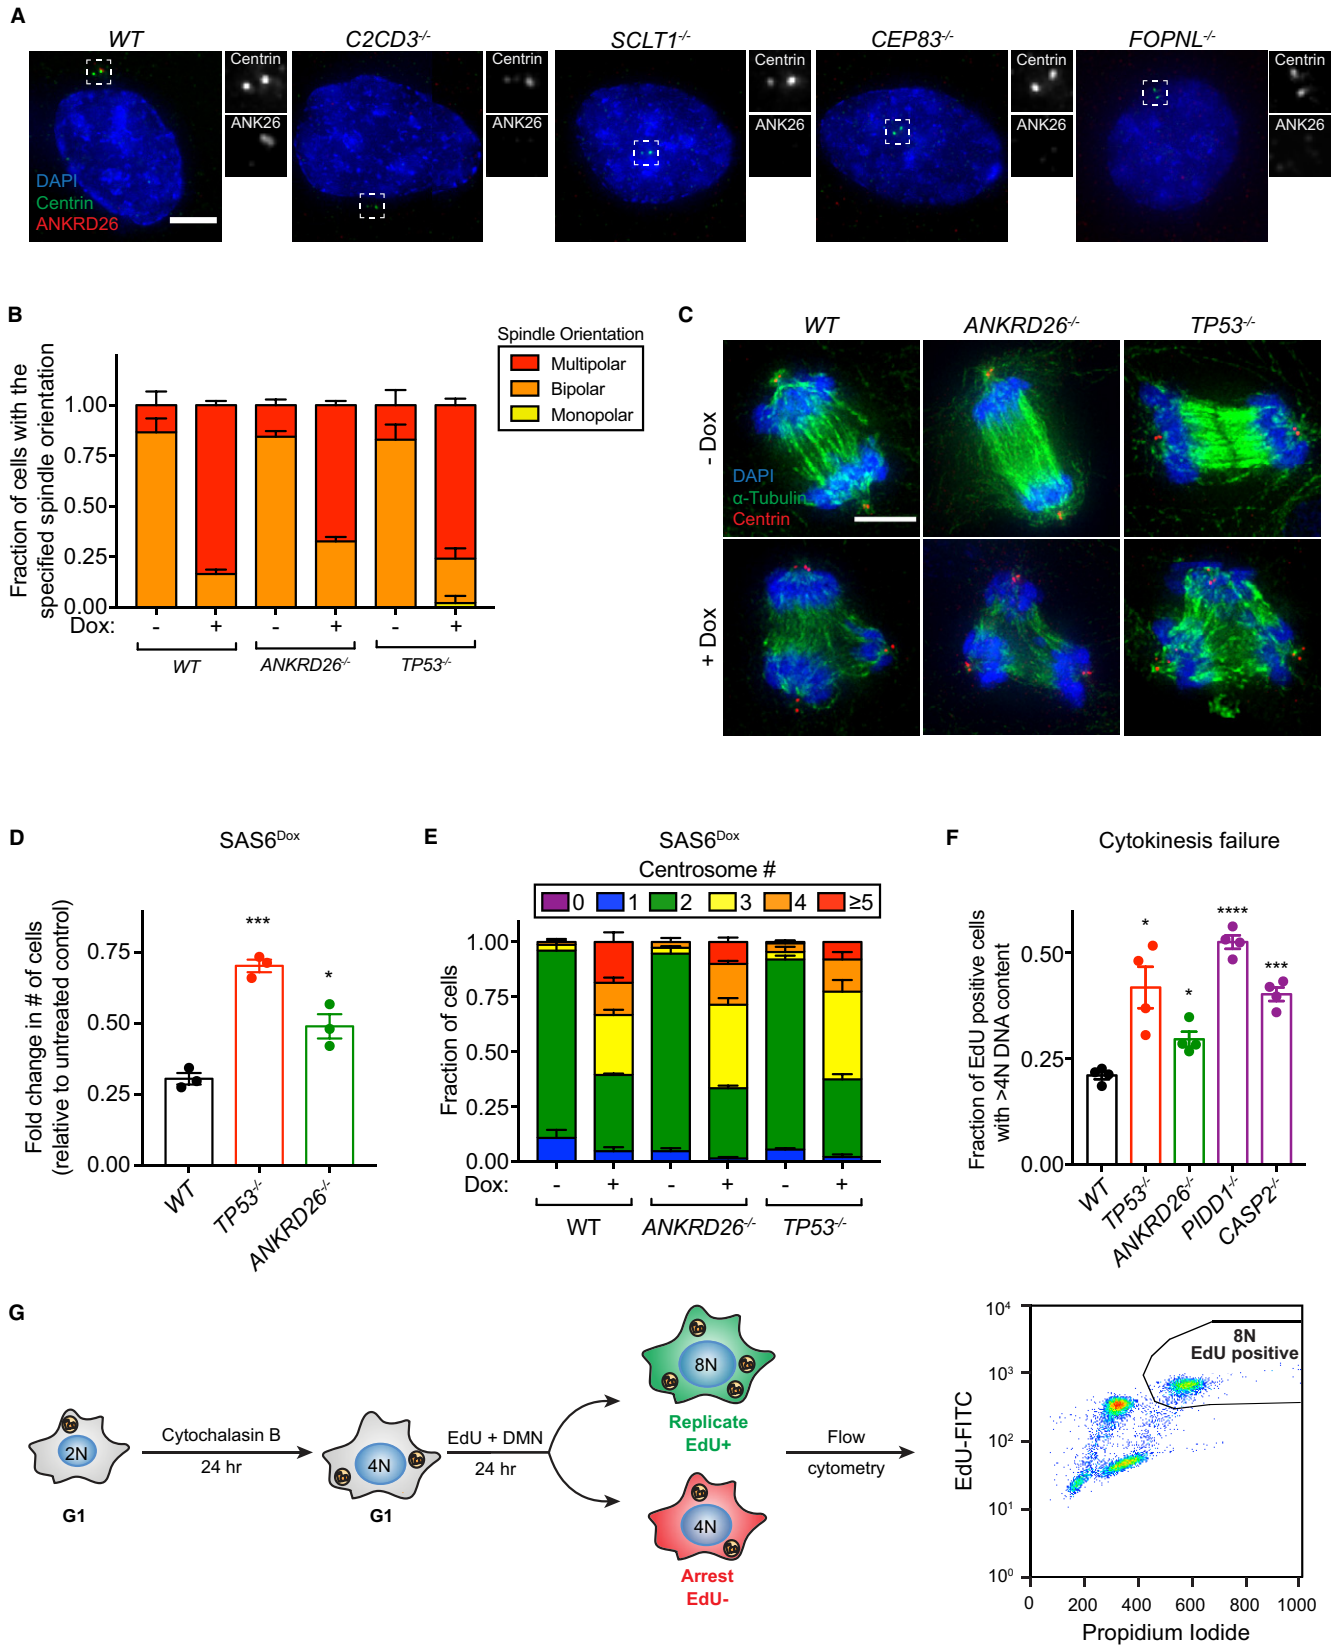

Figure EV2.

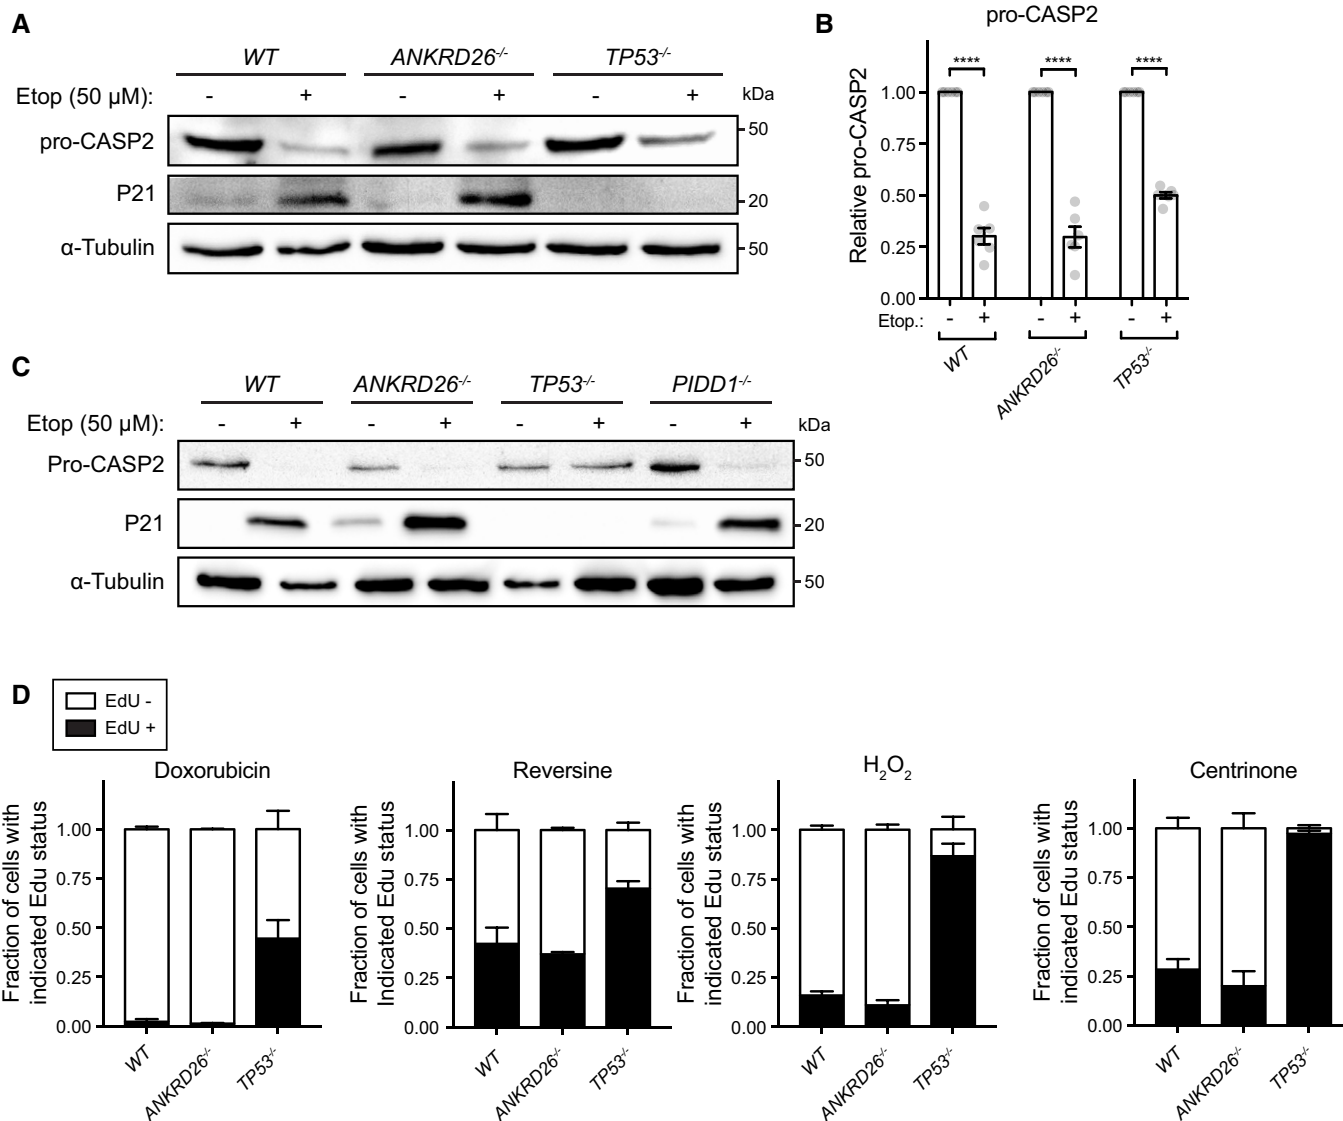

**Figure EV3. ANKRD26 is not required to activate the PIDDosome in response to DNA damage.**

A Western blot showing expression of pro-CASP2 and P21 following treatment with etoposide. Experiments were performed in monoclonal PLK4<sup>Dox</sup> knockout cells.  
 B Quantification of pro-CASP2 levels following treatment with etoposide. Experiments were performed in monoclonal PLK4<sup>Dox</sup> knockout cells. Each dot displays measurements from a single experiment. Data acquired across *n* = 6 biological replicates. Mean ± s.e.m.  
 C Western blot showing expression of pro-CASP2 and P21 following treatment with etoposide. Experiments were performed in PLK4<sup>Dox</sup> cells knocked out for the indicated genes.  
 D Quantification of the fraction of proliferating cells following treatment with the indicated drugs/reagents. Experiments were performed in monoclonal PLK4<sup>Dox</sup> knockout cells. Data acquired across *n* = 3 biological replicates. Mean ± s.e.m.

Data information: Asterisks indicate statistically significant differences between measurements (\*\*\*\**P* < 0.0001). Statistics for all Figures were calculated using a two-tailed Student's *t*-test.

Source data are available online for this figure.

**Figure EV4. An ANKRD26<sup>AM2</sup> mutant fails to recruit PIDD1 to the distal appendage.**

- A Schematic representation of wild-type ANKRD26 and various mutants.
- B Quantification of the fraction of cells with ANKRD26 localized to the mature mother centriole in monoclonal *ANKRD26*<sup>-/-</sup> PLK4<sup>Dox</sup> cells expressing the indicated mCherry-ANKRD26 transgene. Each dot displays measurements from a single experiment. Data acquired across  $n \geq 3$  biological replicates. Mean  $\pm$  s.e.m.
- C Quantification of the fraction of cells with PIDD1 localized to the mature mother centriole in monoclonal *ANKRD26*<sup>-/-</sup> PLK4<sup>Dox</sup> cells expressing the indicated mCherry-ANKRD26 transgene. Each dot displays measurements from a single experiment. Data acquired across  $n = 3$  biological replicates. Mean  $\pm$  s.e.m.
- D Representative images of monoclonal *ANKRD26*<sup>-/-</sup> PLK4<sup>Dox</sup> cells expressing the indicated mCherry-ANKRD26 transgene. Cells were immunostained with indicated antibodies. Scale bar = 5  $\mu$ m.
- E Schematic of the co-immunoprecipitation procedure performed in (F).
- F HEK293FT cells were transfected with the indicated constructs. Cell lysates were split and subjected to co-immunoprecipitation with mCherry or GFP binder beads.
- G Quantification of the fraction of cells with PIDD1 localized to the mature mother centriole in monoclonal *PIDD1*<sup>-/-</sup> PLK4<sup>Dox</sup> cells expressing the indicated PIDD1 transgene. Each dot displays measurements from a single experiment. Data acquired across  $n = 3$  biological replicates. Mean  $\pm$  s.e.m.
- H Representative images of monoclonal *PIDD1*<sup>-/-</sup> PLK4<sup>Dox</sup> cells expressing the indicated PIDD1 transgene. Cells were immunostained with indicated antibodies. Scale bar = 5  $\mu$ m.

Data information: Asterisks indicate statistically significant differences between measurements (<sup>ns</sup> $P > 0.05$ ; \* $P < 0.05$ ; \*\* $P < 0.01$ ; \*\*\*\* $P < 0.0001$ ). Statistics for all Figures were calculated using a two-tailed Student's *t*-test.

Source data are available online for this figure.

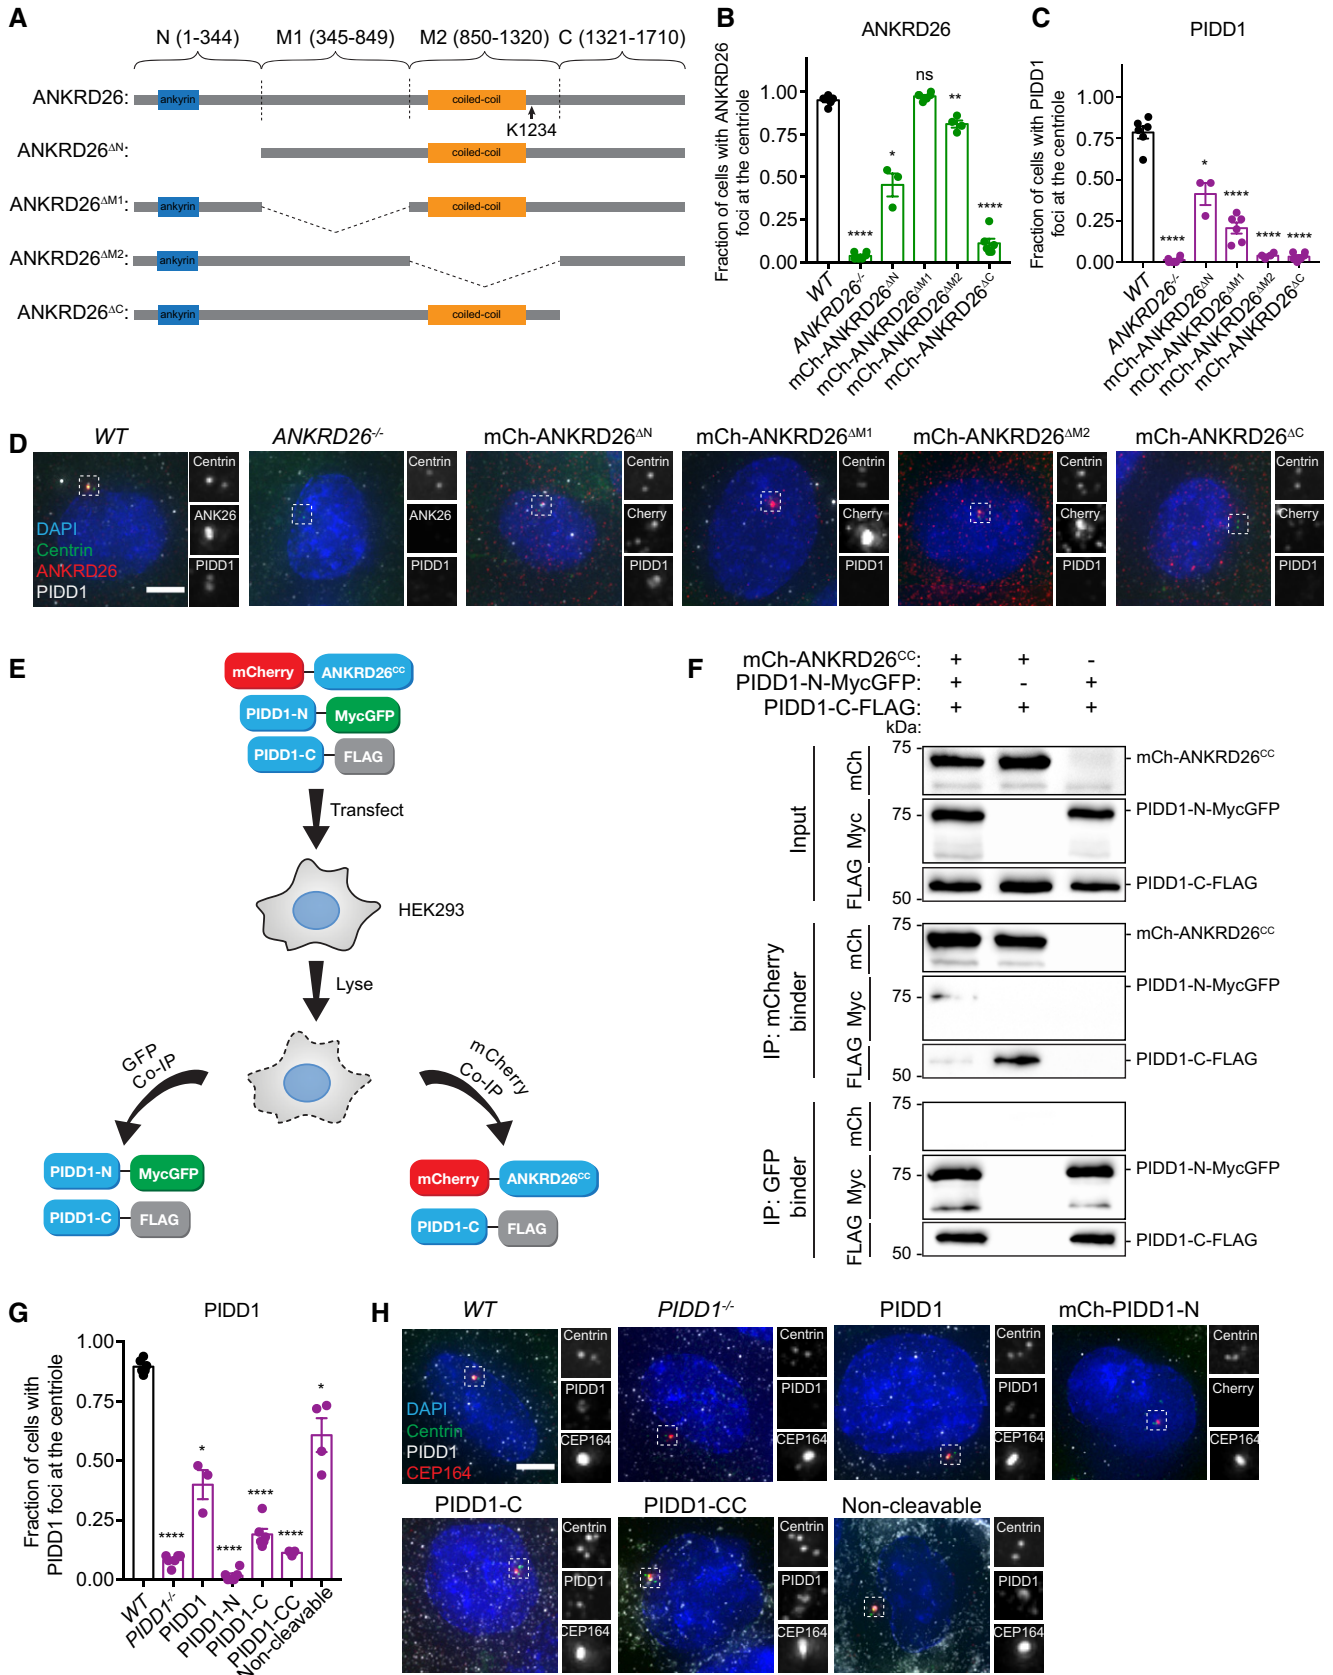

Figure EV4.

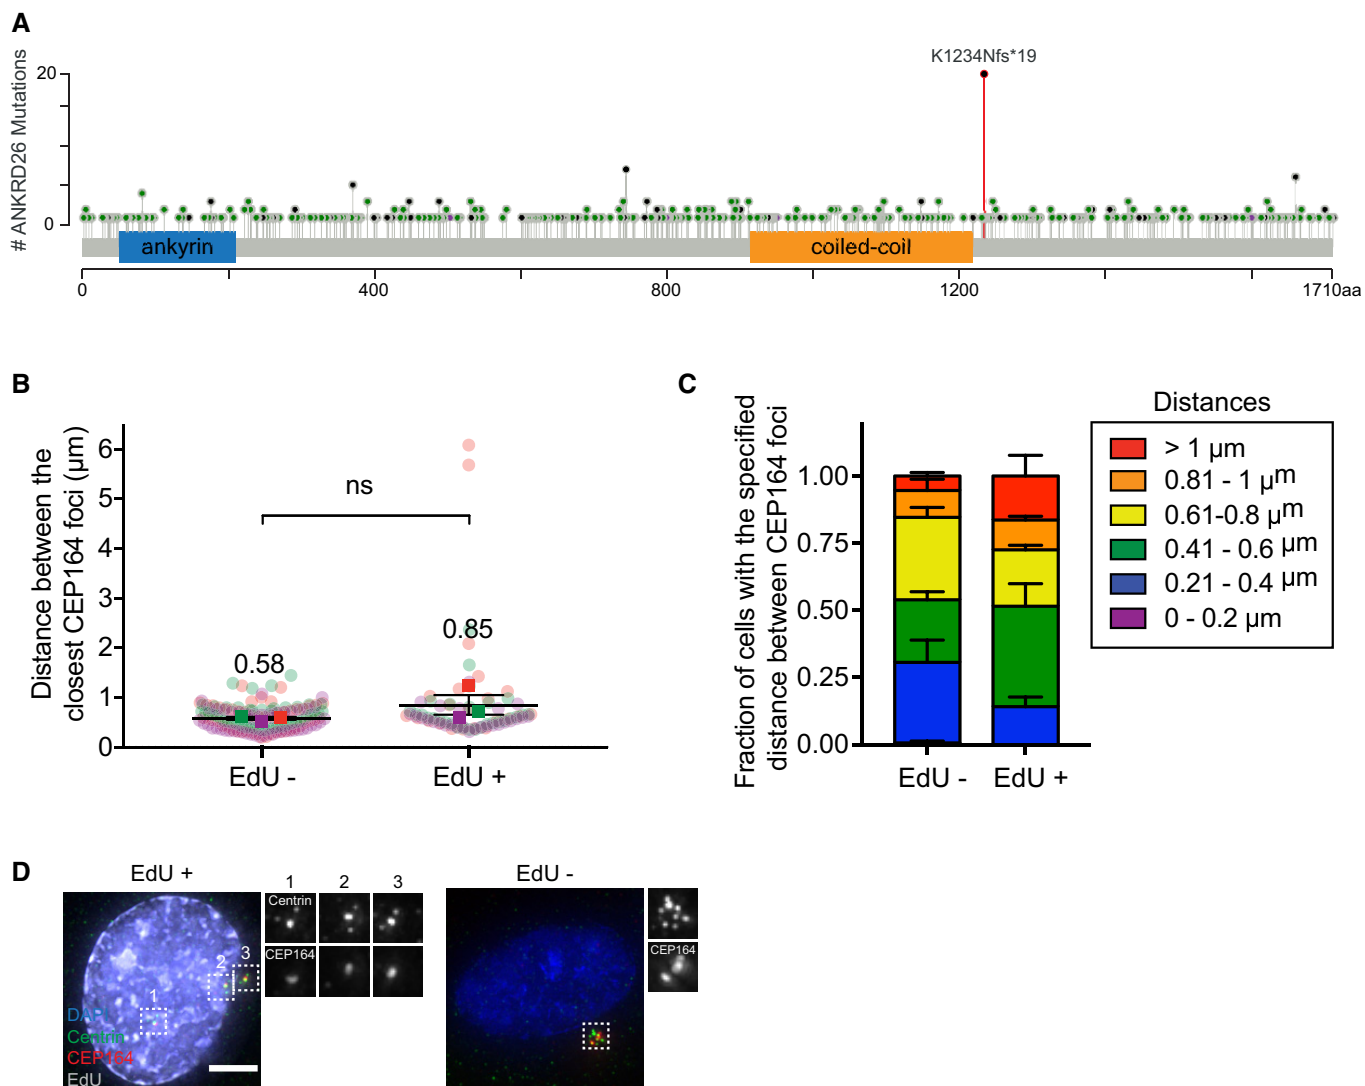

**Figure EV5. A recurrent ANKRD26 mutation is observed in human tumors.**

A Schematic showing the location of the 533 mutations in ANKRD26 in human tumors. Black represents truncating mutations; green represents missense mutations; purple represents inframe mutations. The K1234Nfs\*19 mutation is shown in red. Data from curated set of non-redundant studies in cBioPortal (Cerami *et al*, 2012).

B Plot showing the distance between the closest CEP164 rings in cycling (EdU+) and non-cycling (EdU– cells). Squares show the mean for each biological replicate; colored circles show individual data points from each of the replicates. Data acquired across  $n = 3$ , biological replicates, each with  $> 20$  cells.  $P$  values, unpaired two-tailed  $t$ -test. Mean  $\pm$  s.e.m.

C Stacked bar graphs of the same data shown in (B). Mean  $\pm$  s.e.m.

D Representative images of PLK4<sup>Dox</sup> RPE1 cells treated with and without doxycycline for two days and immunostained with the indicated antibodies. Scale bar = 5  $\mu$ m.

Source data are available online for this figure.
